# Supplementary material for: Causes of Kidney Graft Failure in a Cohort of Recipients With a Very Long-Time Follow-Up After Transplantation
Source: PubMed Central journal article supplement (PMC9207199; doi:10.3389/fmed.2022.842419), 2022-06-06
Supplement: Table_1.pdf [file Table_1.pdf]

Table S1. Underlying kidney disease of kidney transplant recipients per age category

|                                          | 18-39 years | 40-55 years | >55 years | All recipients |
|------------------------------------------|-------------|-------------|-----------|----------------|
| Hypertensive nephropathy/atherosclerosis | 13,6%       | 22,4%       | 46,4%     | 30,3%          |
| Glomerulonephritis//glomerulopathy       | 33,3%       | 28,2%       | 15,5%     | 24,1%          |
| - IgA nephropathy                        | 10.6%       | 8.2%        | 2.7%      |                |
| - FSGS                                   | 3.0 %       | 4.7%        | 2.7%      |                |
| - MPGN                                   | 1.5%        | 3.5%        | 0.9%      |                |
| - SLE/vasculitis                         | 6.0%        | 8.2%        | 3.6%      |                |
| - Other                                  | 12.1%       | 3.5%        | 5.4%      |                |
| Diabetic nephropathy                     | 7,6%        | 10,6%       | 10,9%     | 10,0%          |
| Nephrolithiasis                          | 0,0%        | 1,2%        | 0,9%      | 0,8%           |
| Reflux nephropathy                       | 19,7%       | 4,7%        | 0,0%      | 6,5%           |
| Polycystic disease                       | 4,5%        | 17,6%       | 10,9%     | 11,5%          |
| Other                                    | 15,2%       | 7,1%        | 8,2%      | 9,6%           |
| Unknown                                  | 6,1%        | 8,2%        | 7,3%      | 7,3%           |
| Count                                    | 66          | 85          | 110       | 261            |
