# Supplementary material for: Causes of Kidney Graft Failure in a Cohort of Recipients With a Very Long-Time Follow-Up After Transplantation
Source: PubMed Central journal article supplement (PMC9207199; doi:10.3389/fmed.2022.842419), 2022-06-06
Supplement: Table_2.pdf [file Table_2.pdf]

Table S2 Causes of death of recipients with a functioning kidney allograft after 15 year follow up stratified for different age categories at time of transplantation

|                                            | 18-39 yrs | 40-54 yrs  | >55 yrs    | All recipients |
|--------------------------------------------|-----------|------------|------------|----------------|
| Number of deceased recipients at follow-up | 12        | 36         | 90         | 138            |
| Causes of death                            |           |            |            |                |
| - Malignancy                               | 6 (50%)   | 14 (38,9%) | 22 (24,4%) | 42 (30,4%)     |
| - Infection                                | 1 (8,3%)  | 3 (8,3%)   | 16 (17,8%) | 20 (14,5%)     |
| - Cardiovascular disease                   | 3 (25,0%) | 5 (13,9%)  | 22 (24,4%) | 30 (21,7%)     |
| - Other                                    | 1 (8,3%)  | 5 (13,9%)  | 15 (16,7%) | 21 (15,2%)     |
| - Unknown                                  | 1 (8,3%)  | 9 (25,0%)  | 15 (16,7%) | 25 (18,1%)     |
